# Supplementary material for: Circulating irisin levels in patients with MAFLD: an updated systematic review and meta-analysis
Source: Frontiers journal article supplement (doi:10.3389/fendo.2024.1464951), 2024-12-17
Supplement: Table_2.pdf [file Table_2.pdf]

## GRADE summary of findings table.

| Outcome | Participants (studies)      | Risk of bias | Inconsistency             | Indirectness | Imprecision | Other considerations               | Overall certainty of evidence |
|---------|-----------------------------|--------------|---------------------------|--------------|-------------|------------------------------------|-------------------------------|
| Irisin  | 15<br>Observational studies | Not serious  | Very serious <sup>1</sup> | Not serious  | Not serious | Plausible confounding <sup>2</sup> | VERY LOW                      |

<sup>1</sup>Serious inconsistency due to significant heterogeneity( $I^2>90\%$ )

<sup>2</sup>All plausible residual confounding would reduce the demonstrate effect. Some of the studies do not match the basic information of two groups, like age, BMI and so on.
